# Supplementary material
Source: PubMed Central journal article supplement (PMC7306177)
Supplement: NIHMS1593235-supplement-Supplemental_material.pdf [file NIHMS1593235-supplement-Supplemental_material.pdf]

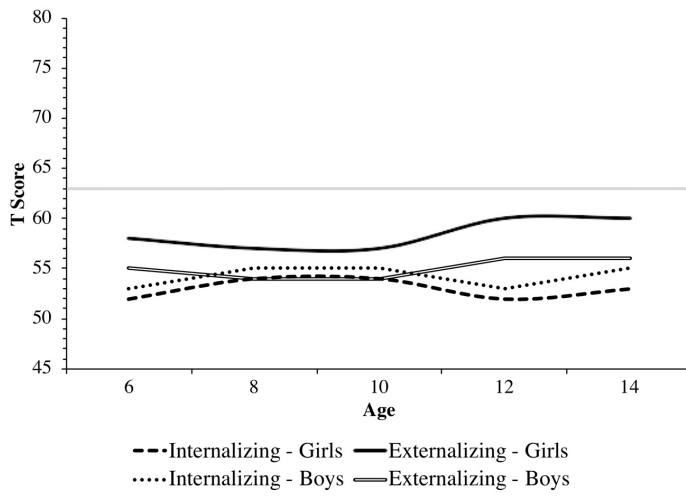

**Supplemental Figure 1.** Bivariate growth curve with quadratic terms.

*Note.* The y-axis indicates T-scores on the CBCL. T-scores greater than 63 are considered to be clinically significant
